# Supplementary material for: Evaluating Provitamin A Carotenoids and Polar Metabolite Compositions during the Ripening Stages of the Agung Semeru Banana (Musa paradisiaca L. AAB)
Source: Int J Food Sci. 2020 May 12;2020:8503923. doi: 10.1155/2020/8503923 (PMC7240789; doi:10.1155/2020/8503923)
Supplement: Supplementary Materials — Supplementary Table 1: carotenoid concentrations, total carotenoids, and vitamin A activity in the Agung Semeru plantain at all ripening stages, resolved using HPLC and spectrophotometry UV-Vis. Supplementary Table 2: polar metabolite compounds from the Agung Semeru plantain at all ripening stages, resolved by gas chromatography-mass spectrometry (GC-MS). Supplementary Figure 1: a typical separation profile of the targeted polar metabolite compounds from the Agung Semeru plantain in ripening stage 5, resolved by gas chromatography-mass spectrometry (GC-MS). [file 8503923.f1.zip]

Archive with 3 entries (3 files):
- mat.8503923.v2.docx
- Supplementary Table 1.xlsx
- Supplementary Table 2.xlsx
