# Supplementary material for: Evaluating Provitamin A Carotenoids and Polar Metabolite Compositions during the Ripening Stages of the Agung Semeru Banana (Musa paradisiaca L. AAB)
Source: Int J Food Sci. 2020 May 12;2020:8503923. doi: 10.1155/2020/8503923 (PMC7240789; doi:10.1155/2020/8503923)
Supplement: Supplementary Materials — Supplementary Table 1: carotenoid concentrations, total carotenoids, and vitamin A activity in the Agung Semeru plantain at all ripening stages, resolved using HPLC and spectrophotometry UV-Vis. Supplementary Table 2: polar metabolite compounds from the Agung Semeru plantain at all ripening stages, resolved by gas chromatography-mass spectrometry (GC-MS). Supplementary Figure 1: a typical separation profile of the targeted polar metabolite compounds from the Agung Semeru plantain in ripening stage 5, resolved by gas chromatography-mass spectrometry (GC-MS). [file 8503923.f1.zip › Supplementary Table 1.xlsx]

## Sheet: Supplementary Table 1
Ripening stages	Concentration of pigments (µg/100 g dw)			Total carotenoids (µg/100 g dw)
	Lutein	α-car	β-car
Stage 1	48.38 ± 6.64	3684.79 ± 166.33	3645.61 ± 201.50	6128.73 ± 253.25
Stage 2	50.75 ± 3.08	3388.11 ± 144.40	3398.82 ± 142.59	5774.95 ± 267.43
Stage 3	93.49 ± 21.13	3019.82 ± 423.09	2850.88 ± 419.24	5487.85 ± 499.65
Stage 4	76.07 ± 11.84	2850.27 ± 153.27	2758.74 ± 198.69	5151.80 ± 286.66
Stage 5	80.40 ± 13.77	3677.33 ± 248.50	3332.91 ± 106.15	6405.03 ± 217.06
Stage 6	54.68 ± 24.20	2509.88 ± 137.78	2238.94 ± 174.46	4609.29 ± 630.48
Stage 7	39.11 ± 11.78	3042.13 ± 431.46	2630.09 ± 398.70	5264.66 ± 409.11
