# Supplementary material for: Evaluating Provitamin A Carotenoids and Polar Metabolite Compositions during the Ripening Stages of the Agung Semeru Banana (Musa paradisiaca L. AAB)
Source: Int J Food Sci. 2020 May 12;2020:8503923. doi: 10.1155/2020/8503923 (PMC7240789; doi:10.1155/2020/8503923)
Supplement: Supplementary Materials — Supplementary Table 1: carotenoid concentrations, total carotenoids, and vitamin A activity in the Agung Semeru plantain at all ripening stages, resolved using HPLC and spectrophotometry UV-Vis. Supplementary Table 2: polar metabolite compounds from the Agung Semeru plantain at all ripening stages, resolved by gas chromatography-mass spectrometry (GC-MS). Supplementary Figure 1: a typical separation profile of the targeted polar metabolite compounds from the Agung Semeru plantain in ripening stage 5, resolved by gas chromatography-mass spectrometry (GC-MS). [file 8503923.f1.zip › Supplementary Table 2.xlsx]

## Sheet: Supplementary Table 2
Peak	Retention time (tR)	Compound	Molecular formula	Molecular mass	Molecular mass - TMS	m/z	Ripening Stages
							1	2	3	4	5	6	7
1	2.25	Hydantoin	C3H4N2O2	100	100	-	+	+	-	-	-	-	-
2	2.43	Oxalic acid 1	C2H2O2	90	234	147, 73, 45, 131	-	+	-	-	-	-	-
3	2.51	Oxalic acid 2	C2H2O2	90	234	147, 73, 45, 131	+	+	-	-	-	-	-
4	11.53	Phosphoric acid	H3PO4	98	314	73, 299, 300, 147	+	+	-	+	+	+	+
5	11.88	Methylmalonic acid	C4H6O4	118	262	147, 73, 247, 215	-	-	+	+	-	-	-
6	13.32	Malic acid	C4H6O5	134	350	73, 147, 233, 245	+	+	+	+	+	+	+
7	13.65	Aspartic acid	C4H7NO4	133	349	282, 73, 100, 147	+	-	-	-	-	-	-
8	13.75	Pyroglutamic acid	C5H7NO3	129	273	156, 73, 147, 230	+	+	-	-	-	-	-
9	16.51	Ribitol / Adonitol	C5H12O5	152	512	217, 73, 147, 103	+	+	+	+	+	+	+
10	17.93	Fructose 1	C6H12O6	180	540	103, 217, 73, 307	-	-	+	+	+	+	-
11	18.18	Citric acid	C6H8O7	192	480	73, 217, 201, 147	+	+	+	+	+	+	+
12	18.6	Altrose	C6H12O6	180	540	217, 73, 191, 147	-	-	+	+	+	+	+
13	18.79	Fructose 2	C6H12O6	180	540	103, 217, 73, 307	-	-	+	-	-	-	-
14	19.15	Fructose 3	C6H12O6	180	540	103, 217, 73, 307	+	+	+	+	+	+	+
15	19.33	Fructose 4	C6H12O6	180	540	103, 217, 73, 307	+	+	+	+	+	+	+
16	19.4	Galactitol	C6H14O6	182	614	73, 306, 217, 103	-	-	+	+	+	+	-
17	19.63	Glucose 1	C6H12O6	180	627	73, 319, 204, 147	+	+	+	+	+	+	+
18	19.66	Glucose 2	C6H12O6	180	627	73, 319, 204, 147	-	-	+	+	+	+	+
19	19.85	Mannose 1	C6H12O6	180	540	73, 204, 191, 217	-	-	-	-	-	-	+
20	20.01	Glucose 3	C6H12O6	180	627	73, 319, 204, 147	-	-	+	+	+	+	+
21	20.17	Lyxose 1	C5H10O5	150	438	73, 204, 217, 361	-	-	-	-	-	-	+
22	20.6	Mannose 2	C6H12O6	180	540	73, 204, 191, 217	-	-	-	-	-	-	+
23	20.68	Lyxose 2	C5H10O5	150	438	73, 204, 217, 361	-	-	-	-	-	+	-
24	21.22	Glucose 4	C6H12O6	180	627	73, 319, 204, 147	+	+	+	+	+	+	+
25	32.67	Sucrose	C12H22O11	342	918	361, 73, 217, 437	+	+	+	+	+	+	+
26	33.26	Maltose 1	C12H22O11	342	918	204, 191, 73, 217	-	-	+	+	+	-	-
27	33.92	Maltose 2	C12H22O11	342	918	204, 191, 73, 217	-	-	+	+	+	+	+
